# Supplementary material for: Prognostic Value of the Neutrophil-to-Lymphocyte Ratio before and after Radiotherapy for Anaplastic Thyroid Carcinoma
Source: MDPI journal article supplement (doi:10.3390/cancers13081913), 2021-04-15
Supplement: s1 [file s1]

# Supplementary Materials: Prognostic Value of the Neutrophil-to-Lymphocyte Ratio before and After Radiotherapy for Anaplastic Thyroid Carcinoma

Jiyun Park, Jun Park, Jung Hee Shin, Young Lyun Oh, Hyun Ae Jung, Man Ki Chung, Jun-Ho Choe, Yong Chan Ahn, Sun Wook Kim, Jae Hoon Chung, Tae Hyuk Kim and Jae Myoung Noh

**Table S1.** Overall survival according to the total radiation dose (based on 60 Gy) in patients with available complete blood cell count data after radiotherapy for anaplastic thyroid carcinoma.

| Survival | EQD2 <sub>10</sub> |        |
|----------|--------------------|--------|
|          | <60 Gy             | ≥60 Gy |
| Died     | 12                 | 5      |
| Alive    | 1                  | 7      |

EQD2<sub>10</sub>, equivalent dose in 2 Gy fractions with an  $\alpha/\beta$  ratio of 10.

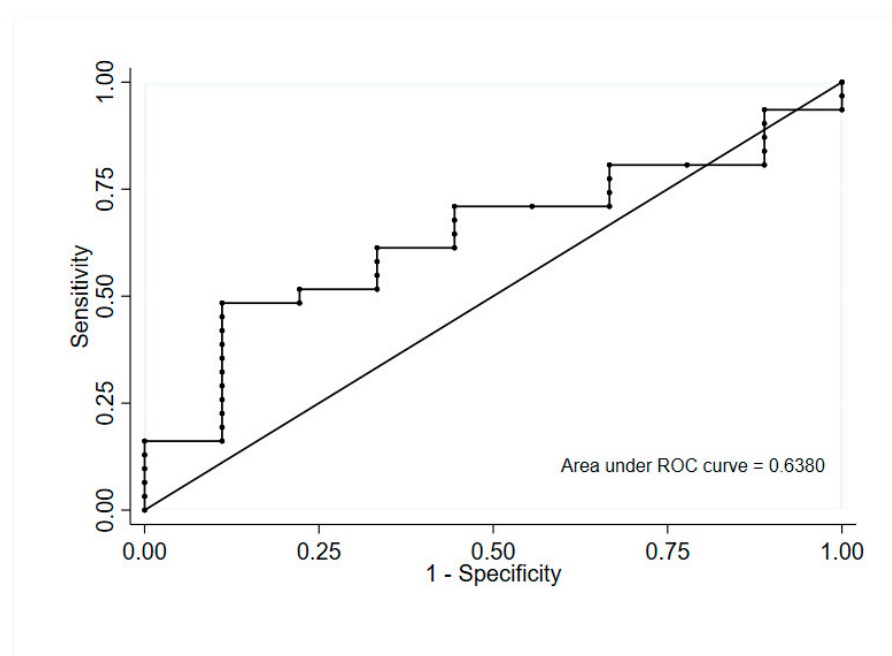

**Figure S1.** ROC curve assessing the cutoff points of baseline NLR. ROC, receiver operating characteristics; NLR, neutrophil-to-lymphocyte ratio.

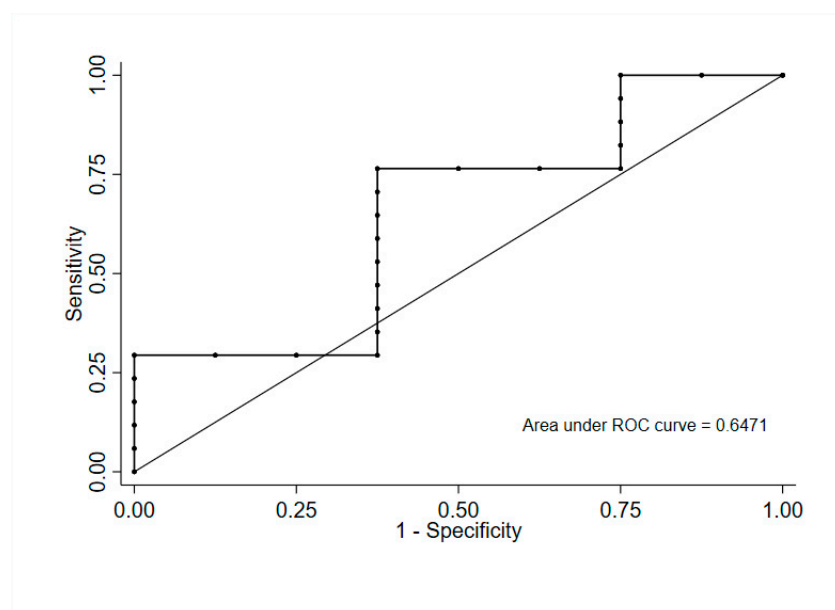

**Figure S2.** ROC curve assessing the cutoff points of post-RT-NLR. ROC, receiver operating characteristics; RT, radiation therapy; NLR, neutrophil-to-lymphocyte ratio.
